# Supplementary material
Source: publisher figshare collection journal article supplement (https://acs.figshare.com/ndownloader/files/4149280)
Supplement: Supplementary file 1 [file 4149280]

## Efficient, low cost synthesis of sodium platinum bronze $\text{Na}_x\text{Pt}_3\text{O}_4$ .

David Horwat<sup>Ψ,Φ</sup>, Moukrane Dehmas<sup>Ψ,Φ</sup>, Alejandro Gutiérrez<sup>Π</sup>, Jean-François Pierson<sup>Ψ,Φ</sup>, André Anders<sup>¶</sup>, Flavio Soldera<sup>⊥</sup>, José-Luis Endrino<sup>§</sup>

*Ψ Université de Lorraine, Institut Jean Lamour, UMR 7198, Nancy, F-54000, France*

*Φ CNRS, Institut Jean Lamour, UMR 7198, Nancy, F-54000, France*

*Π Departamento de Física Aplicada and Instituto Nicolás Cabrera, Universidad Autónoma de Madrid, Cantoblanco, 28049 Madrid, Spain*

*¶ Lawrence Berkeley National Laboratory, University of California, 1 Cyclotron Road, Berkeley, California 94720, USA*

*⊥ Functional Materials, Saarland University, P.O. Box 151150, D-66041 Saarbrücken, Germany*

*§ Abengoa Research, Campus Palmas Altas, E-41014 Sevilla, Spain*

E-mail Address: [david.horwat@ijl.nancy-universite.fr](mailto:david.horwat@ijl.nancy-universite.fr), Tel: +33 (0)3 83 58 42 52

## Supporting information

### I-Synthesis

The platinum oxide ( $\text{PtO}_y$ ) thin films were synthesized by magnetron sputtering in pure oxygen at a pressure of 4 Pa. The platinum target with a chemical composition better than 99.9 at% was sputtered with a medium frequency supply (Advanced Energy Pinnacle+) by applying an average discharge current of 1 A at a frequency of 350 kHz. The target to substrate distance was fixed to 5 cm. The films deposited on soda lime glass (SLG) and silicon wafer pieces were subsequently annealed in air for 2 hours at different temperatures.

### II-Chemical analysis

Energy dispersive X-ray spectroscopy (EDX) measurements were performed at different positions between the film/substrate interface and the film surface within the JEOL JEM-2100F transmission electron microscope. Secondary ion mass spectroscopy Na/Pt depth profiles were collected by using a cesium ion gun. The profile measured on the sample annealed in air at 570°C is shown in Figure 1. As the EDX measurements stated a Na/Pt atomic ratio of 1.5 at the film substrate interface (600 nm from the film surface), this SIMS profile represents the evolution of the Na/Pt atomic ratio.

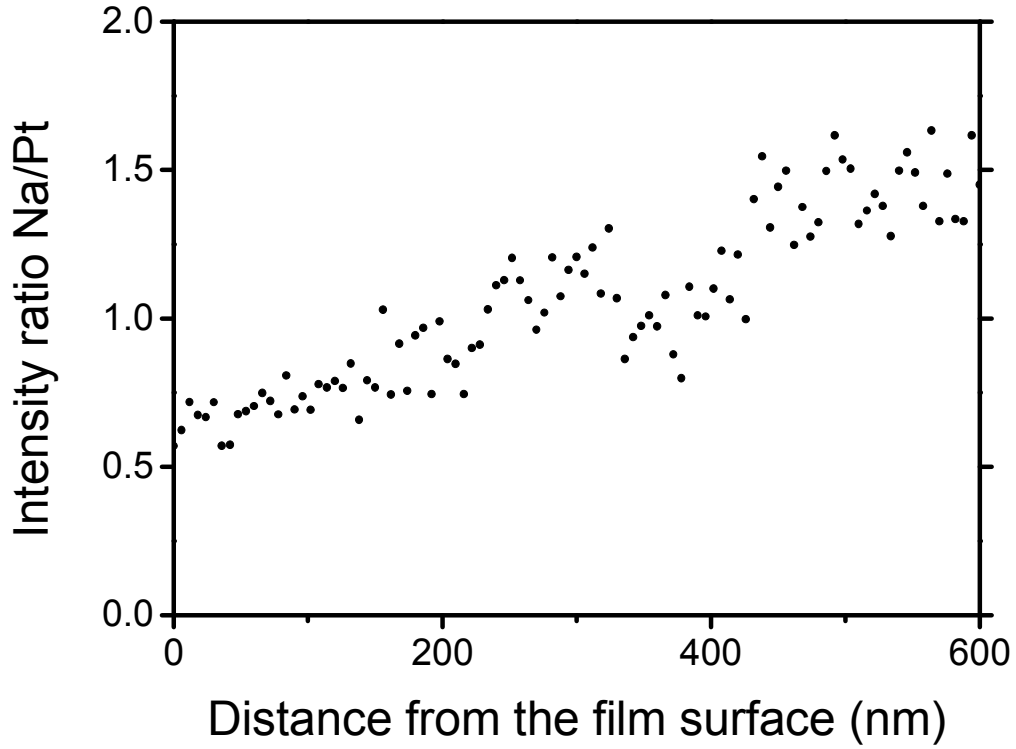

Figure 1: SIMS depth profile of the Na/Pt intensity ratio for the sample annealed at 570°C.

The electronic structure of the films at the Pt-L<sub>3</sub> edge was probed by X-ray absorption near edge structure (XANES) using the synchrotron radiation of the KMC2 beamline of the BESSY 2 synchrotron at the Helmholtz Zentrum Berlin. The bulk-sensitive fluorescence yield (FLY) procedure was used under quasi-normal excitation and take off at 45° from the sample surface. The oxydation state of platinum has been calculated by taking into account the contribution of a single 5 d empty state of metallic platinum to the area of the X-ray absorption resonance. This contribution has been extracted from the X-ray absorption signal of the Platinum foil. Details of the procedure can be found in [1] for platinum compounds and similarly in [2] for gold compounds.

### III-Structural analysis

The X-ray diffraction signal was collected with  $\lambda$ -k<sub>a</sub>Co=0.179 nm using an INEL diffractometer with an incident angle of 4°. Figure 2 presents the diffractogramm of the sample annealed in air at 570°C after background removal and the corresponding Rietveld refinement. The structural parameters of the NaPt<sub>3</sub>O<sub>4</sub> phase used for the calculation are listed in Table 1 and caption.

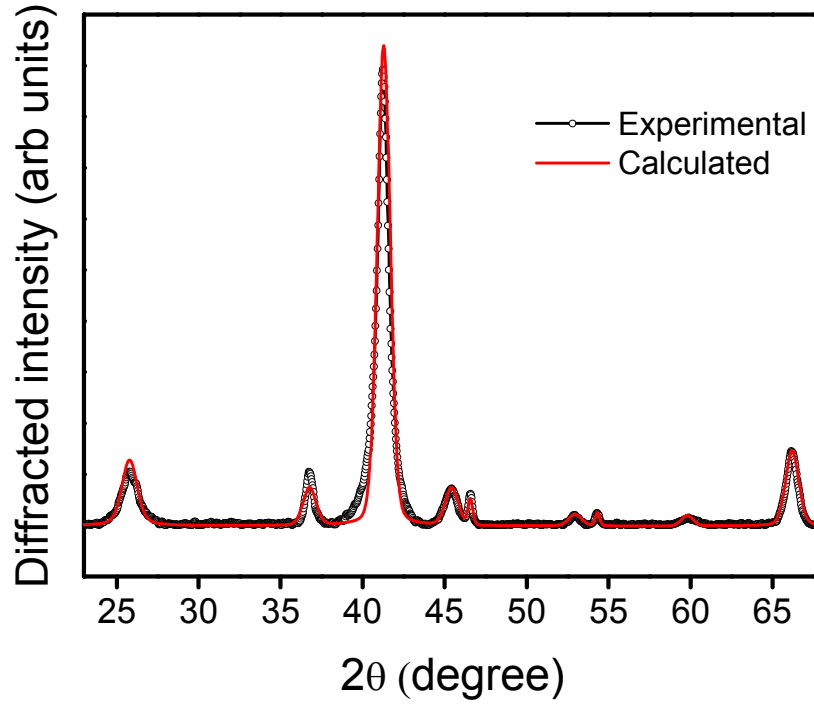

Figure 2: X-ray diffractogram and corresponding Rietveld refinement of the sample annealed at 570°C

| Atom | Wickoff | x    | y    | z    | Occ |
|------|---------|------|------|------|-----|
| Na   | 2a      | 0.0  | 0.0  | 0.0  | 1   |
| Pt   | 6c      | 0.25 | 0.0  | 0.50 | 1   |
| O    | 8e      | 0.25 | 0.25 | 0.25 | 1   |

Table 1: Structural parameters for the NaPt<sub>3</sub>O<sub>4</sub> phase at 25°C: Pm3n (No. 223) with a=5.674 Å.

Raman analyses were performed on the film annealed at 570°C using a Horiba LabRAM HR confocal microscope equipped with a 532 nm laser beam. The laser power was limited to approx. 2 mW. Figure 3 shows a spectrum characteristic for the analysed sample. It presents two main contributions peaking at 186 and 683 cm<sup>-1</sup>, which are representative of the vibrational signature of the Na<sub>x</sub>Pt<sub>3</sub>O<sub>4</sub> structure [3].

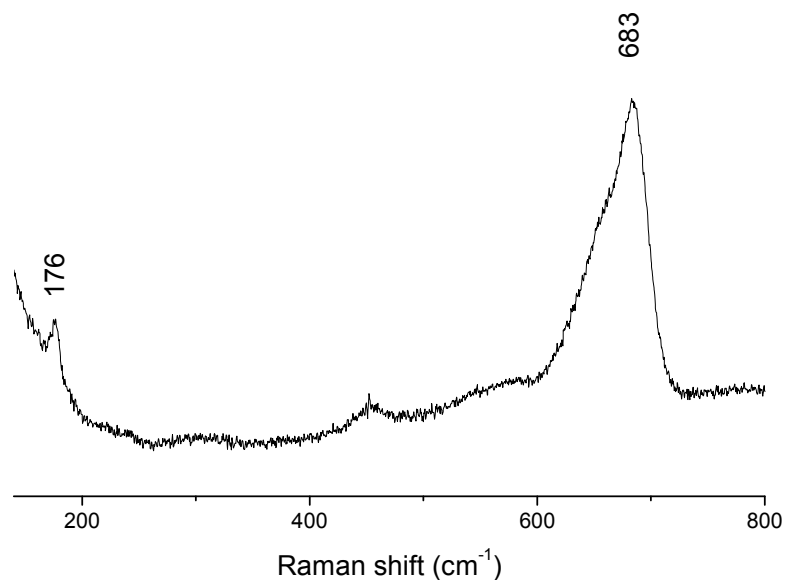

Figure 3: Raman spectrum collected on the sample annealed at 570°C.

High resolution transmission electron microscopy (HRTEM) was performed with a JEOL JEM-2100F. Samples were prepared in a focused ion beam (FIB)/scanning electron microscope (SEM) dual beam system (FEI Strata DB235) by using the “in-situ” lift-out technique. Thinning of the foil was done with an acceleration voltage of 30 kV at the beginning and with 5 kV at the end to minimize any possible preparation artifact.

[1] Lytle, F.W. *J. Catal.* **1976**, *43*, 376379.

[2] Hlil, E.K.; Baudoin-Savois, R.; Moraweck, B.; Renouprez, A.J. *J. Phys. Chem.* **1996**, *100*, 3102.

[3] Graham, G.W.; Weber, W.H.; McBride, J.R.; Peters, C.R. *J. Raman Spectrosc.* **1991**, *22*, 1.
